# Supplementary material
Source: PubMed Central journal article supplement (PMC11220904)

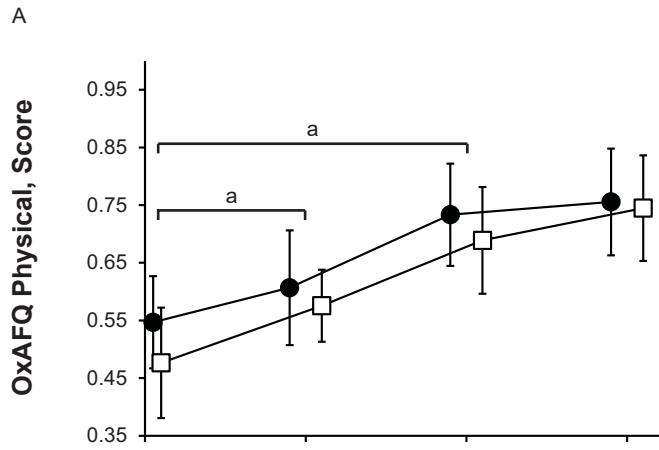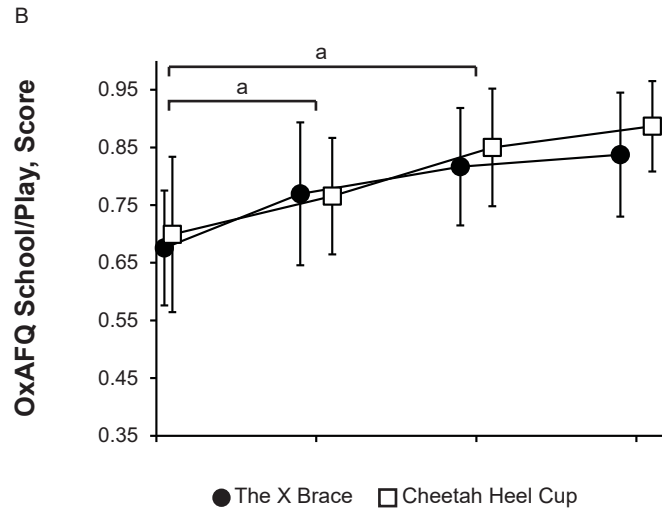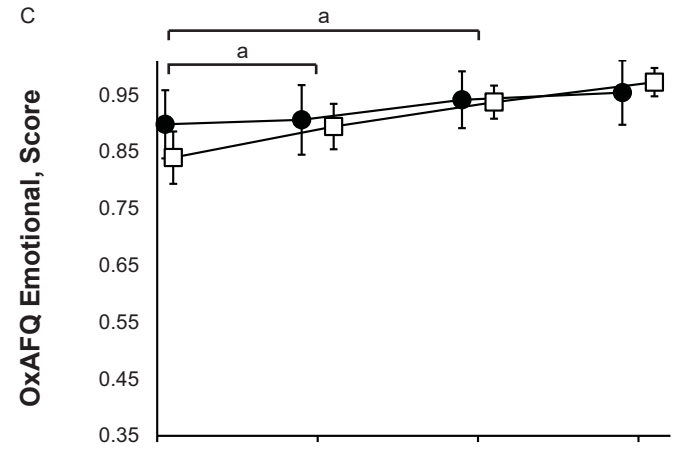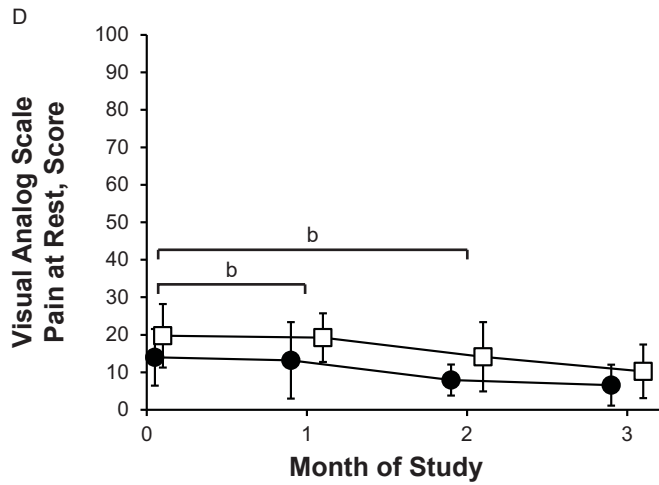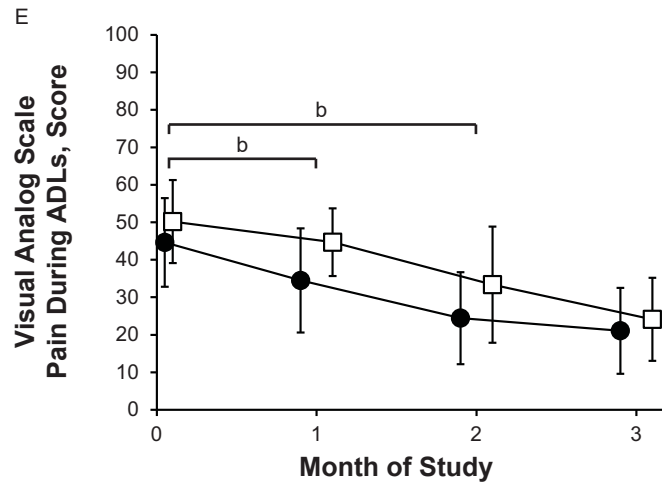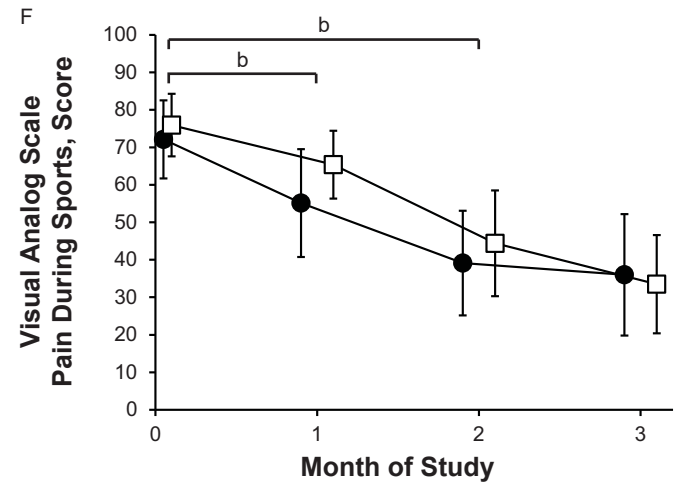

Supplement: attr-58-07-01_s03.pdf [file attr-58-07-01_s03.pdf]
